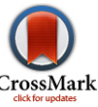

# HPLC-MS/MS Analyses Show That the Near-Starchless *aps1* and *pgm* Leaves Accumulate Wild Type Levels of ADPglucose: Further Evidence for the Occurrence of Important ADPglucose Biosynthetic Pathway(s) Alternative to the pPGI-pPGM-AGP Pathway

Abdellatif Bahaji<sup>1</sup>\*, Edurne Baroja-Fernández<sup>1</sup>\*, Ángela María Sánchez-López<sup>1</sup>\*, Francisco José Muñoz<sup>1</sup>, Jun Li<sup>1</sup>, Goizeder Almagro<sup>1</sup>, Manuel Montero<sup>1</sup>, Pablo Pujol<sup>2</sup>, Regina Galarza<sup>2</sup>, Kentaro Kaneko<sup>3</sup>, Kazusato Oikawa<sup>3</sup>, Kaede Wada<sup>3</sup>, Toshiaki Mitsui<sup>3</sup>, Javier Pozueta-Romero<sup>1</sup>\*

**1** Instituto de Agrobiotecnología, Universidad Pública de Navarra/Consejo Superior de Investigaciones Científicas/Gobierno de Navarra, Mutiloabeti, Nafarroa, Spain, **2** Servicio de Apoyo a la Investigación, Universidad Pública de Navarra, Campus de Arrosadia, Iruña, Nafarroa, Spain, **3** Department of Applied Biological Chemistry, Niigata University, Niigata, Japan

## Abstract

In leaves, it is widely assumed that starch is the end-product of a metabolic pathway exclusively taking place in the chloroplast that (a) involves plastidic phosphoglucomutase (pPGM), ADPglucose (ADPG) pyrophosphorylase (AGP) and starch synthase (SS), and (b) is linked to the Calvin-Benson cycle by means of the plastidic phosphogluco isomerase (pPGI). This view also implies that AGP is the sole enzyme producing the starch precursor molecule, ADPG. However, mounting evidence has been compiled pointing to the occurrence of important sources, other than the pPGI-pPGM-AGP pathway, of ADPG. To further explore this possibility, in this work two independent laboratories have carried out HPLC-MS/MS analyses of ADPG content in leaves of the near-starchless *pgm* and *aps1* mutants impaired in pPGM and AGP, respectively, and in leaves of double *aps1/pgm* mutants grown under two different culture conditions. We also measured the ADPG content in wild type (WT) and *aps1* leaves expressing in the plastid two different ADPG cleaving enzymes, and in *aps1* leaves expressing in the plastid GlgC, a bacterial AGP. Furthermore, we measured the ADPG content in *ss3/ss4/aps1* mutants impaired in starch granule initiation and chloroplastic ADPG synthesis. We found that, irrespective of their starch contents, *pgm* and *aps1* leaves, WT and *aps1* leaves expressing in the plastid ADPG cleaving enzymes, and *aps1* leaves expressing in the plastid GlgC accumulate WT ADPG content. In clear contrast, *ss3/ss4/aps1* leaves accumulated ca. 300 fold-more ADPG than WT leaves. The overall data showed that, in Arabidopsis leaves, (a) there are important ADPG biosynthetic pathways, other than the pPGI-pPGM-AGP pathway, (b) pPGM and AGP are not major determinants of intracellular ADPG content, and (c) the contribution of the chloroplastic ADPG pool to the total ADPG pool is low.

**Citation:** Bahaji A, Baroja-Fernández E, Sánchez-López ÁM, Muñoz FJ, Li J, et al. (2014) HPLC-MS/MS Analyses Show That the Near-Starchless *aps1* and *pgm* Leaves Accumulate Wild Type Levels of ADPglucose: Further Evidence for the Occurrence of Important ADPglucose Biosynthetic Pathway(s) Alternative to the pPGI-pPGM-AGP Pathway. PLoS ONE 9(8): e104997. doi:10.1371/journal.pone.0104997

**Editor:** Frederik Börnke, Leibniz-Institute for Vegetable and Ornamental Plants, Germany

**Received:** May 15, 2014; **Accepted:** July 16, 2014; **Published:** August 18, 2014

**Copyright:** © 2014 Bahaji et al. This is an open-access article distributed under the terms of the Creative Commons Attribution License, which permits unrestricted use, distribution, and reproduction in any medium, provided the original author and source are credited.

**Data Availability:** The authors confirm that all data underlying the findings are fully available without restriction. All relevant data are within the paper and its Supporting Information Files.

**Funding:** This research was partially supported by the grants [BIO2010-18239] from the Comisión Interministerial de Ciencia y Tecnología and Fondo Europeo de Desarrollo Regional (Spain) and [IIM010491.RI1] from the Government of Navarra, and by Iden Biotechnology. This research was also supported by Scientific Research on Innovative Areas [22114507] and Grants-in-Aid for Scientific Research (B) [22380186] from the Ministry of Education, Culture, Sports, Science and Technology, Japan. The funders had no role in study design, data collection and analysis, decision to publish, or preparation of the manuscript.

**Competing Interests:** This research was partially supported by the grants BIO2010-18239 from the Comisión Interministerial de Ciencia y Tecnología and Fondo Europeo de Desarrollo Regional (Spain), IIM010491.RI1 from the Government of Navarra, and by the Scientific Research on Innovative Areas [22114507] and Grants-in-Aid for Scientific Research (B) [22380186] from the Ministry of Education, Culture, Sports, Science and Technology, Japan. This research was also supported by Iden Biotechnology S.L. This does not alter the authors' adherence to PLOS ONE policies on sharing data and materials, and there are no restrictions on the sharing of data and/or materials. A-M.S.-L. acknowledges a predoctoral fellowship from the Spanish Ministry of Science and Innovation.

\* Email: javier.pozueta@unavarra.es

† These authors contributed equally to this work.

## Introduction

Starch is a branched homopolysaccharide of  $\alpha$ -1,4-linked glucose subunits with  $\alpha$ -1,6-linked glucose at the branched points. Synthesized by starch synthases (SSs) using ADPglucose (ADPG)

as the sugar donor molecule, this polyglucan accumulates as predominant storage carbohydrate in most plants. In leaves, up to 50% of the photosynthetically fixed carbon is retained within the chloroplasts of mesophyll cells during the day to synthesize starch [1,2], which is then remobilized during the subsequent night to

support non-photosynthetic metabolism and growth by continued export of carbon to the rest of the plant. Due to the diurnal rise and fall cycle of its levels, foliar starch is termed “transitory starch”.

It is widely assumed that the whole starch biosynthetic process occurring in mesophyll cells of leaves resides exclusively in the chloroplast [3–5]. According to this classical view of starch biosynthesis, starch is considered the end-product of a metabolic pathway that is linked to the Calvin-Benson cycle by means of the plastidic phosphoglucose isomerase (pPGI). This enzyme catalyzes the conversion of fructose-6-phosphate from the Calvin-Benson cycle into glucose-6-phosphate (G6P), which is then converted into glucose-1-phosphate (G1P) by the plastidic phosphoglucomutase (pPGM). ADPG pyrophosphorylase (AGP) then converts G1P and ATP into inorganic pyrophosphate and ADPG necessary for starch biosynthesis (**Figure 1A**). These three enzymatic steps are reversible, but the last step is rendered irreversible upon hydrolytic breakdown of PPi by plastidial alkaline pyrophosphatase.

The classic view of transitory starch biosynthesis also implies that AGP is the sole source of ADPG, and functions as the major regulatory step in the starch biosynthetic process [3–7]. Plant AGPs are heterotetrameric enzymes comprising two types of homologous but distinct subunits, the small (APS) and the large (APL) subunits [9,10]. In *Arabidopsis*, six genes encode proteins with homology to AGP. Two of these genes (*APS1* and *APS2*) code for small subunits, and four (*APL1-APL4*) encode large subunits [9–11]. *APS2* is in a process of pseudogenization [12] since its expression level is two orders of magnitude lower than that of *APS1* [10], and its product lacks activity due to the absence of essential amino acids involved in the catalysis and/or in the binding of G1P and 3-phosphoglycerate [9]. Whereas *APS1*, *APL1* and *APL2* are catalytically active, *APL3* and *APL4* have lost their catalytic properties during evolution [13]. In *Arabidopsis*, the large subunits are highly unstable in the absence of small subunits [14]. Therefore, *APS1* null mutants lack not only *APS1*, but also the large subunits, which results in a total lack of AGP activity [13,15].

In *Arabidopsis*, genetic evidence showing that transitory starch biosynthesis occurs solely by the pPGI-pPGM-AGP pathway has been obtained from the characterization of mutants impaired in pPGI [16,17], pPGM [18,19] and AGP [13,14,20]. Despite the monumental amount of data apparently supporting the classic interpretation of transitory starch biosynthesis in mesophyll cells involving the pPGI-pPGM-AGP pathway (**Figure 1A**), mounting evidence has exposed inconsistencies that previews the occurrence of important pathway(s) of transitory starch biosynthesis wherein (a) pPGI plays a minor role in the connection of the Calvin-Benson cycle with the starch biosynthetic pathway, (b) a sizable pool of ADPG linked to starch biosynthesis is produced in the cytosol by enzymes such as sucrose synthase (SuSy) [27–32], (c) cytosolic ADPG is transported to the chloroplast by the action of a yet to be identified ADPG translocator [33], and (d) pPGM and AGP play important roles in the scavenging of glucose units derived from starch breakdown occurring during starch biosynthesis and during the biogenesis of the starch granule [27,28,32,34]. According to this interpretation of transitory starch biosynthesis (schematically illustrated in **Figure 1B**), starch accumulation in leaves is the result of the balance between *de novo* starch synthesis from ADPG entering the chloroplast and breakdown, and the efficiency by which starch breakdown products are recycled back to starch by means of pPGM and AGP. Thus, according to this interpretation of transitory starch biosynthesis, starch is actively synthesized in pPGM and AGP mutants, but its accumulation is prevented due to the blockage of the mechanism of scavenging of glucose units

derived from the starch breakdown [15,34]. The occurrence of starch turnover during illumination is not surprising since pulse-chase and starch-preloading experiments using isolated chloroplasts [35,36], intact leaves [37,38], or cultured photosynthetic cells [39] have shown that chloroplasts can synthesize and mobilize starch simultaneously. Furthermore, recent metabolic flux analyses carried out using illuminated *Arabidopsis* plants cultured in  $^{13}\text{CO}_2$ -enriched environment revealed rapid labelling of maltose, the main starch degradation product [40]. Also, leaves of *sex1-1* mutants impaired in  $\beta$ -amylolytic starch breakdown accumulated 3–4 fold more starch than WT leaves when plants were cultured under continuous light conditions [41]. Moreover, simultaneous synthesis and breakdown of glycogen has been shown to widely occur in animals [42–44] and in bacteria [45–48]. In this respect we must emphasize that many bacterial species co-express glycogen biosynthetic and breakdown genes in a single transcriptional unit, which guarantees simultaneous synthesis and breakdown of glycogen [49–53] (for a review see [54]).

The possible occurrence of sources, other than the pPGI-pPGM-AGP pathway, of ADPG linked to starch biosynthesis has been a matter of debate for more than 20 years [3–5,28–30,32,34,55–60]. In attempting to solve this controversy, we recently carried out HPLC analyses of ADPG content in leaves of the near-starchless *adg1-1* and *aps1* *Arabidopsis* mutants impaired in AGP [15]. We also measured the ADPG content in the leaves of both wild type (WT) and *aps1* plants ectopically expressing the *Escherichia coli* ADPG hydrolase EcASPP [61] either in the cytosol or the chloroplast [15]. We reasoned that if leaves produce starch from ADPG exclusively synthesized in the plastid, plastidial expression of EcASPP competing with SS for ADPG, but not cytosolic EcASPP expression, should lead to reduction of both starch and ADPG content. Conversely, if ADPG linked to starch biosynthesis occurs both in the plastid and in the cytosol, but mainly accumulates in the cytosol, plants expressing EcASPP in the cytosol should accumulate reduced levels of both ADPG and starch content, whereas plants expressing EcASPP in the plastid should accumulate normal ADPG but reduced starch. We also measured the starch and ADPG contents in leaves of *aps1* mutants expressing in the chloroplast the *E. coli* AGP (GlgC) [15]. We found that *adg1-1* and *aps1* leaves accumulate nearly WT ADPG contents, the estimated values of ca. 0.3–0.4 nmol ADPG/g fresh weight (FW) being comparable to those reported by Szecowka et al. [40], Barratt et al. [58] and Crumpton-Taylor et al. (Table S3 in [62]) for WT leaves using HPLC-MS/MS, and those reported by Chen and Thelen [63] using HPLC. These values, however, were 5–10 fold lower than those reported for WT leaves by Lunn et al. [64], Ragel et al. [65], Martins et al. [66] and Crumpton-Taylor et al. (Table 1 in [62]) using HPLC-MS/MS. We also found that *aps1* leaves expressing GlgC in the plastid accumulate WT levels of both starch and ADPG [15]. As expected, expression of EcASPP in the chloroplast resulted in the reduction of starch content [15]. Noteworthy, this reduction in starch content was not accompanied by a significant reduction in the intracellular levels of ADPG. Moreover, plants expressing EcASPP in the cytosol accumulated reduced levels of both starch and ADPG [15]. The overall data thus provided strong evidence that (a) there occur important source(s) other than AGP, of ADPG linked to starch biosynthesis, (b) AGP is a major determinant of starch accumulation but not of intracellular ADPG content in *Arabidopsis*, (c) most of ADPG has an extraplastidial localization in WT leaves and (d) cytosolic ADPG is linked to starch biosynthesis. The occurrence of an important pool of cytosolic ADPG is not surprising since leaf cells possess cytosolic ADPG metabolizing enzymes such as ADPG phosphorylase (ADPGP) [67] and glucan

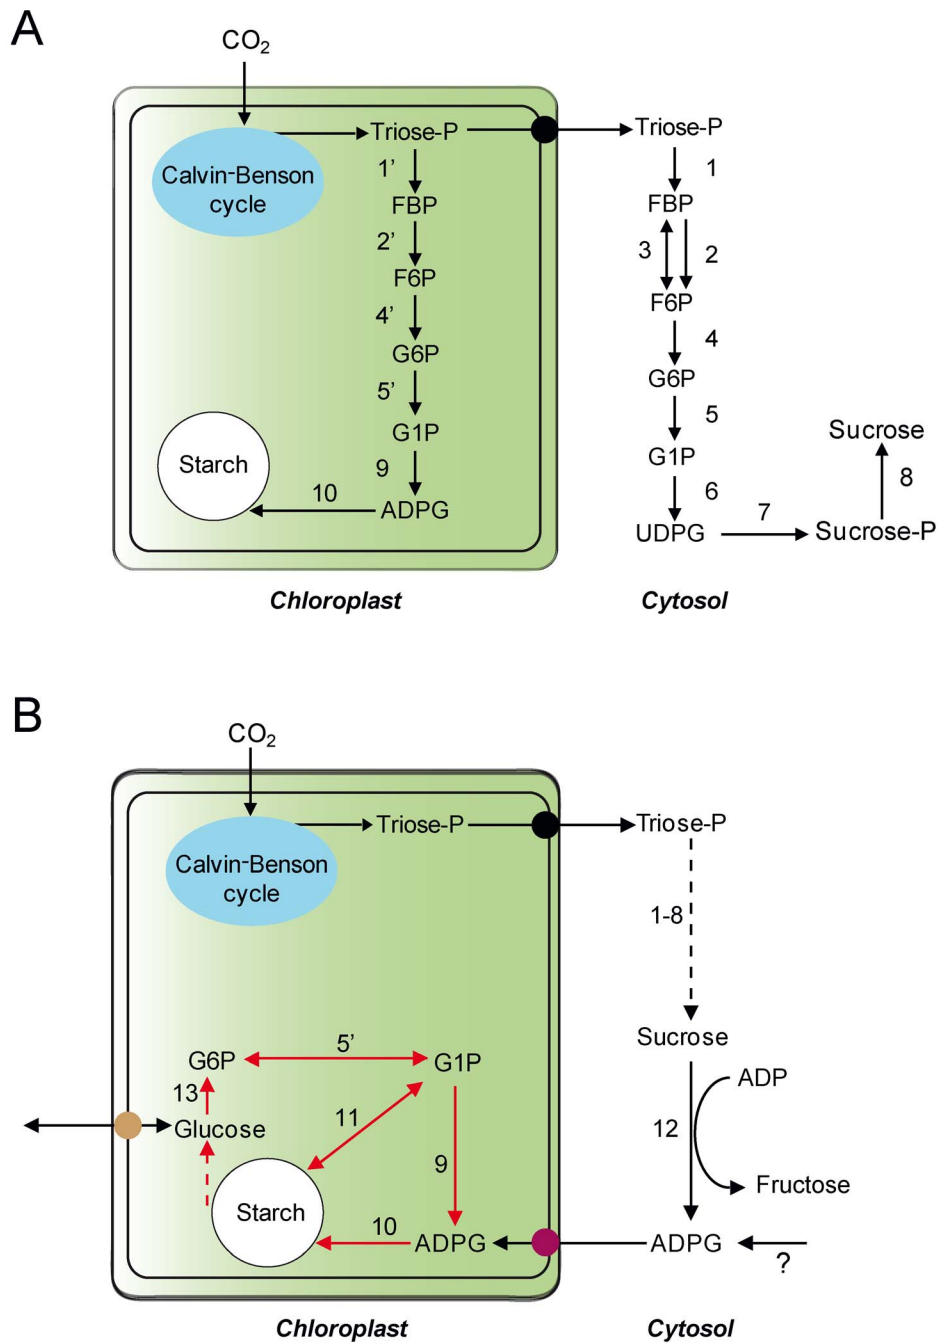

**Figure 1. Suggested models of starch biosynthesis in leaves.** (A) The classic model of starch biosynthesis according to which (a) the starch biosynthetic process takes place exclusively in the chloroplast, segregated from the sucrose biosynthetic process taking place in the cytosol, and (b) AGP exclusively catalyzes the synthesis of ADPG. (B) Suggested “additional/alternative” model of starch biosynthesis wherein (a) ADPG is produced in the cytosol by enzyme(s) such as SuSy and then is transported to the chloroplast by the action of an ADPG translocator, and (b) pPGM and AGP play an important role in the scavenging of glucose units derived from starch breakdown. Starch to glucose conversion would involve the coordinated actions of amylases, isoamylase and disproportionating enzyme [21–23]. According to this interpretation of transitory starch biosynthesis starch accumulation in leaves is the result of the balance between *de novo* starch synthesis from ADPG entering the chloroplast and breakdown, and the efficiency by which starch breakdown products are recycled back to starch by means of pPGM and AGP. Thus, this view predicts that the recovery towards starch biosynthesis of the glucose units derived from the starch breakdown will be deficient in pPGM and AGP mutants, resulting in a parallel decline of starch accumulation and enhancement of soluble sugars content since starch breakdown derived products (especially glucose) will leak out the chloroplast through the very active balance glucose translocator [24]. The enzyme activities involved are numbered as follows: 1, 1', fructose-1, 6-bisphosphate aldolase; 2, 2', fructose 1,6-bisphosphatase; 3, PPI:fructose-6-phosphate phosphotransferase; 4, 4', PGI; 5, 5', PGM; 6, UDPG pyrophosphorylase; 7, sucrose phosphate synthase; 8, sucrose-phosphate-phosphatase; 9, AGP; 10, SS; 11, starch phosphorylase; 12, SuSy; 13, plastidial hexokinase [25,26]. FBP: fructose bis-phosphate; UDPG: UDP-glucose. doi:10.1371/journal.pone.0104997.g001

synthase [68]. Likewise, low steady state concentration of ADPG in the plastid should be expected since (a) this nucleotide-sugar spontaneously hydrolyzes to AMP and glucose 1,2-monophosphate under conditions of alkaline pH and high  $Mg^{2+}$  concentration occurring during starch biosynthesis in the illuminated chloroplast [56,69], and (b) SSs rapidly remove ADPG from the stroma to produce starch.

Our previous HPLC analyses of ADPG content in Arabidopsis leaves have been recently questioned by Stütt and Zeeman [5] and Ragel et al. [65], who used HPLC-MS/MS to measure ADPG content in Arabidopsis leaves. These authors reported that *aps1* leaves and leaves of *pgm* plants impaired in pPGM accumulate far lower levels of ADPG than WT leaves. However, values of ADPG content in *pgm* and *aps1* leaves were not shown [5] or not clearly presented [65]. Subcellular localization and determination of ADPG content is critically important to understand starch metabolism and its regulation and connection with other metabolic pathways. Thus, to further investigate the possible occurrence of important ADPG biosynthetic pathway(s) alternative to pPGI-pPGM-AGP, and to test the validity of our previous HPLC-based results and conclusions on ADPG content and subcellular localization, in this work two independent laboratories have carried out HPLC-MS/MS based analysis of ADPG content in leaves of the near-starchless *pgm*, *aps1* and double *pgm/aps1* mutants cultured under two different conditions. We also measured the ADPG content in WT and *aps1* leaves ectopically expressing in the plastid two different ADPG cleaving enzymes, and in *aps1* leaves expressing GlgC in the plastid. Furthermore, we measured the ADPG content in *ss3/ss4/aps1* mutants impaired in starch granule initiation and chloroplastic ADPG synthesis. We found that *pgm*, *aps1* and *pgm/aps1* leaves, and leaves with reduced starch content as a consequence of the ectopic expression of ADPG breakdown enzymes in the plastid accumulate nearly WT ADPG content. Furthermore, we found that *aps1* leaves ectopically expressing GlgC in the plastid accumulate WT starch and ADPG contents. In clear contrast, *ss3/ss4/aps1* leaves accumulated ca. 300 fold-more ADPG than WT leaves. The overall data showed that, in Arabidopsis leaves, (a) there are important ADPG sources other than the pPGI-pPGM-AGP pathway, (b) pPGM and AGP are not major determinants of intracellular ADPG content, and (c) the contribution of the chloroplastic ADPG pool to the total ADPG pool is low.

## Materials and Methods

### Plants, bacterial strains and plant transformation

The work was carried out using WT *Arabidopsis* (ecotype Columbia), the *aps1::T-DNA* mutant (SALK\_040155) [13], the double *aps1::T-DNA/pgm::T-DNA* mutant, the double *ss3::T-DNA/ss4::T-DNA* mutant [70], the *pgm::T-DNA* mutant (GABI\_094D07), the triple *ss3::T-DNA/ss4::T-DNA/aps1::T-DNA* mutant as well as WT, *aps1* and *ss3/ss4* plants transformed with either *35S-TP-P541-glgC* [15], *35S-TP-P541-EcASPP* [15,27], *35S-TP-P541-AtADPGP* or *35S-TP-P541-AtADPGP-GFP* (this work, see below). Plants were grown in pots either on soil or solid MS medium at ambient  $CO_2$  in growth chambers at 20°C under a 16 h light (90  $\mu\text{mol photons sec}^{-1} \text{m}^{-2}$ )/8 h dark regime.

Triple *ss3/ss4/aps1* and double *aps1/pgm* mutants were obtained by crossing and selecting mutants from segregating the F2 populations by PCR on genomic DNA, using the oligonucleotide primers listed in **Table S1** and **Table S2**, respectively. Different *35S-TP-P541-AtADPGP*, *35S-TP-P541-EcASPP* and *35S-TP-P541-AtADPGP-GFP* plasmid constructs conferring resistance to

either kanamycin or hygromycin were produced as illustrated in **Figure S1**. Constructs conferring resistance to hygromycin were used to transform *ss3/ss4* plants. Plasmid constructs were electroporated and propagated in *E. coli* TOP 10. Transfer of the plasmid construct to *Agrobacterium tumefaciens* EHA105 cells was carried out by electroporation. Transformation of *Arabidopsis* plants were conducted as described by Clough and Bent [71]. Transgenic plants were selected on the adequate (kanamycin- or hygromycin-containing) selection medium.

### Enzyme assays

Leaves of 4-weeks old plants were harvested, freeze-clamped and ground to a fine powder in liquid nitrogen with a pestle and mortar. One g of the frozen powder was resuspended at 4°C in 5 ml of 100 mM HEPES (pH 7.5), 2 mM EDTA and 5 mM dithiothreitol, and desalted by ultrafiltration on Centricon YM-10 (Amicon, Bedford, MA). The proteins retained in the filter then were resuspended in 100 mM HEPES (pH 7.5), 2 mM EDTA and 5 mM dithiothreitol. ADPG hydrolytic activity was assayed using the two-step spectrophotometric determination of G1P described by Rodríguez-López et al. [72]. ADPG activity was assayed at 37°C in the direction of ADPG breakdown in two steps: (1) ADPG reaction, and (2) measurement of G1P. In step one, the ADPG assay mixture contained 50 mM HEPES (pH 7.0), 1 mM ADPG, 2 mM Pi, 1 mM  $MgCl_2$ , 1 mM dithiothreitol and the leaf extract in a total volume of 50  $\mu\text{l}$ . The reaction was initiated by adding the leaf extract to the assay mixture. All assays were run with minus ADPG blanks. After 3 min at 37°C, reactions were stopped by boiling the assay reaction mixture for 2 min. In step two, G1P formed was determined spectrophotometrically in a 300  $\mu\text{l}$  mixture containing 50 mM HEPES (pH 7.0), 1 mM EDTA, 2 mM  $MgCl_2$ , 15 mM KCl, 0.6 mM  $NAD^+$ , 1 unit (U) each of PGM and G6P dehydrogenase from *Leuconostoc mesenteroides*, and 30  $\mu\text{l}$  of the step-one reaction. We define 1 U of enzyme activity as the amount of enzyme that catalyzes the production of 1  $\mu\text{mol}$  of product per min.

### Production of polyclonal antisera against AtADPGP and western blot analyses

A complete AtADPGP encoding cDNA from the Arabidopsis Biological Center at Ohio State University [73] was cloned into the pDEST17 expression vector (Invitrogen) to create pDEST17-AtADPGP (**Figure S2**). BL21 C43 (DE3) cells transformed with pDEST-AtADPGP were grown in 100 ml of liquid LB medium to an absorbance at 600 nm of 0.5 and then 1 mM IPTG was added. After 5 h, cells were centrifuged at 6,000 g for 10 min. The pelleted bacteria were resuspended in 6 ml of His-bind binding buffer (Novagen), sonicated and centrifuged at 10,000 g for 10 min. The supernatant thus obtained was subjected to His-bind chromatography (Novagen). The eluted His-tagged AtADPGP was then rapidly desalted by ultrafiltration on Centricon YM-10 (Amicon, Bedford, MA).

The purified recombinant AtADPGP was electrophoretically separated by 12% SDS-PAGE and stained with Coomassie Blue. A ca. 38 kDa protein band was eluted and utilized to produce polyclonal antisera by immunizing rabbits.

For immunoblot analyses, samples were separated on 10% SDS-PAGE, transferred to nitrocellulose filters, and immunodecorated by using the antisera raised against either AtADPGP or EcASPP [27] as primary antibody, and a goat anti-rabbit IgG alkaline phosphatase conjugate (Sigma) as secondary antibody.

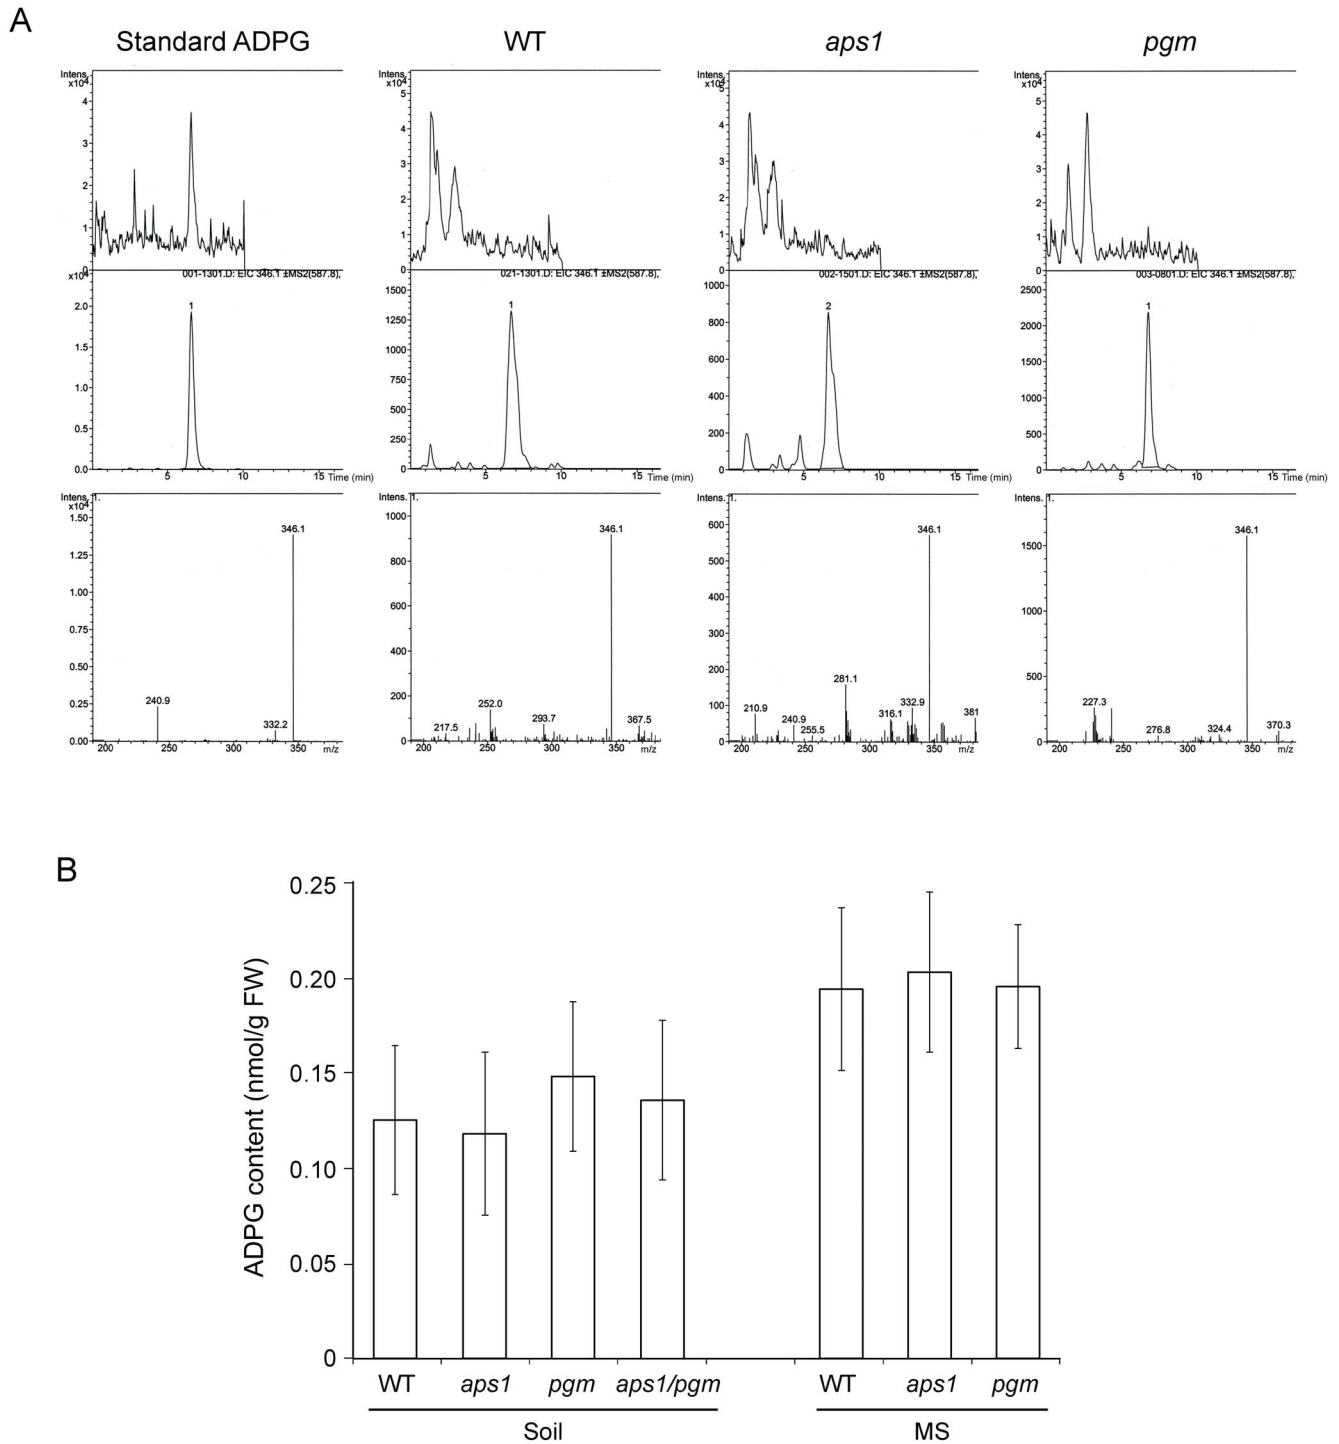

**Figure 2. *aps1* and *pgm* leaves accumulate WT ADPG content.** (A) HPLC-MS/MS detection of ADPG in WT, *aps1* and *pgm* leaves. Upper panels: Total ion chromatograms (TIC) of extracts from the indicated plants in which the selected fragmentation parent ion was 587.8 m/z. Middle panels: Extracted ion chromatograms (EIC) in which the selected ion for fragmentation of the parent ion was 346.1 m/z. Lower panels: Mass spectra (MS2) obtained from fragmentation of parent ion. ADPG was measured using an Agilent 1100 HPLC fitted with a Xbridge C18 column (100×3.0 mm I.D. particle size 3.5 μm) coupled to a MSD-Trap spectrometer (Agilent) (see Materials and Methods for further details). (B) ADPG content in WT, *aps1*, *pgm* and *aps1/pgm* leaves. Plants were simultaneously grown either in soil or solid MS. Leaves from 4-weeks old WT, *aps1*, *pgm* and *aps1/pgm* plants were simultaneously harvested after 10 h of illumination. ADPG was simultaneously extracted from leaves of WT, *aps1*, *pgm* and *aps1/pgm* plants and content was simultaneously measured by HPLC-MS/MS as described in Materials and Methods. Note that, consistent with [15], leaves of *aps1*, *pgm* and *aps1/pgm* plants accumulated WT ADPG content. Values represent the mean ±SD of determinations on three independent samples. doi:10.1371/journal.pone.0104997.g002

### Assay of ADPG content by HPLC-MS/MS

Fully expanded source leaves of 4-weeks old plants were harvested at the indicated illumination period, freeze-clamped and ground to a fine powder in liquid nitrogen with a pestle and mortar. ADPG was then immediately extracted as described by Lunn *et al.* [64]. Aliquots (50–100 mg FW) of the frozen powdered leaves were transferred to pre-cooled tubes and quenched by adding 250  $\mu$ L of ice-cold  $\text{CHCl}_3/\text{CH}_3\text{OH}$  (3:7, v/v). The frozen mixture was warmed to  $-20^\circ\text{C}$  with vigorous shaking, and incubated at  $-20^\circ\text{C}$  for 2 h. ADPG was extracted from the  $\text{CHCl}_3$  phase by adding 200  $\mu$ L of water and warming to  $4^\circ\text{C}$  with repeated shaking. After centrifugation at 420 g for 4 min, the upper, aqueous- $\text{CH}_3\text{OH}$  phase was transferred to a new tube, and kept at  $4^\circ\text{C}$ . The lower,  $\text{CHCl}_3$  phase was re-extracted with 200  $\mu$ L of cold water, centrifuged, and the second aqueous- $\text{CH}_3\text{OH}$  extract was added to the first. The combined aqueous- $\text{CH}_3\text{OH}$  extract was freeze-dried using a lyophilizer and re-dissolved in 250  $\mu$ L of water. High molecular-mass components were removed from the samples by ultrafiltration on vivaspin 500 centrifugal concentrator (Sartorius) at 2,300 g for 2–3 h,  $20^\circ\text{C}$ . Recovery experiments were carried out by the addition of known amounts of ADPG disodium salt (Sigma-Aldrich A0627) standards to the frozen tissue slurry immediately after addition of the cold  $\text{CHCl}_3/\text{CH}_3\text{OH}$ . As described in the “Results and Discussion” section, we found endogenous levels of ADPG of ca.  $0.13 \pm 0.03$  nmol ADPG/g FW (equivalent to 3.1 pmol per 100  $\mu$ L of extract) in leaves of plants cultured on soil. We thus added 5, 10 or 20 pmol of authenticated ADPG standard to the 50–100 mg samples of the frozen plant material (containing 6.5–13 pmol of ADPG) before extraction. Recoveries of the added 5, 10, and 20 pmol of ADPG were  $94 \pm 5.3$ ,  $93 \pm 4.9$  and  $89 \pm 6.6$ , respectively, demonstrating that even the smallest amounts of ADPG were quantitatively recovered.

ADPG content in leaves of plants cultured on soil was measured in the Research Support Service at the Public University of Navarra using an Agilent 1100 HPLC fitted with a Xbridge C18 column (100 $\times$ 3.0 mm I.D. particle size 3.5  $\mu$ m) coupled to a MSD-Trap spectrometer (Agilent). The column was equilibrated with a mixture of 99% solution A (15 mM acetic acid and 10 mM triethylamine, pH 4.95) and 1% solution B (methanol) for 7 min before each sample run. The extracts were eluted with a multi-step gradient as follows: 0–4 min, 99% A; 4–25 min, 99–10% A; 25–30 min, 10–10% A; 30–35 min, 10–95% A. ADPG peak detection in the HPLC elute was made after entering directly into the MSD-Trap, which was operated in a multiple reaction monitoring mode, with an electrospray ionization source in negative ionization mode. For ADPG measurement the parent and product ions selected were 587.8 m/z and 346.1 m/z, respectively, and the fragmentation amplitude was 2.0. ADPG was quantified by comparison of the integrated MSD-Trap signal peak area with a calibration curve obtained using ADPG disodium salt as standard.

ADPG of leaves of plants cultured on solid MS was extracted as described above and measured in Niigata University using liquid chromatography-mass spectrometer consisting of LaChrom Elite-HPLC system with L-2130 pump (Hitachi) and LTQ Orbitrap XL (ThermoFisher Scientific) controlled by Xcalibur 2.0 software as described previously [74]. Reversed-phase ion-pair chromatography separation was carried out on a Hypersil GOLD column (50 $\times$ 2.1 mm, 5  $\mu$ m particle size, ThermoFisher Scientific). An aliquot of sample (10  $\mu$ L) was loaded onto the Hypersil GOLD column equilibrated with solvent A at flow rate of 150  $\mu$ L  $\text{min}^{-1}$ . Solvent A was 97:3 water:methanol with 10 mM tributylamine and 15 mM acetic acid; solvent B was methanol. The gradient is: 0–2.5 min, 100% A; 2.5–5 min, 100–80% A; 5–7.5 min, 80% A;

7.5–13 min, 80–45% A; 13–15.5 min, 45–5% A; 15.5–18.5 min, 5% A; 18.5–19 min, 5–100% A; 19–25 min, 100% A. Other liquid chromatography parameters are autosampler temperature  $4^\circ\text{C}$ , injection volume 10  $\mu$ L, and column temperature  $30^\circ\text{C}$ . The MS data was acquired full scans from 450–1000 m/z at 1 Hz and 30,000 resolution in negative ion mode using only Orbitrap.

### Confocal microscopy

Subcellular localization of AtADPGP-GFP was performed using D-Eclipse C1 confocal microscope (NIKON, Japan) equipped with standard Ar 488 laser excitation, BA515/30 filter for green emission, BA650LP filter for red emission and transmitted light detector for bright field images.

### Starch measurement

Starch was measured by using an amyloglucosydase-based test kit (Boehringer Mannheim).

## Results and Discussion

### *pgm* and *aps1* leaves accumulate WT ADPG content

We conducted HPLC-MS/MS analyses of ADPG content in *pgm* and *aps1* mutants cultured on soil and solid MS medium conditions (see Materials and Methods for further details). As shown in **Figure 2**, these analyses revealed that ADPG contents in leaves of WT plants cultured on soil and solid MS medium after 10 h of illumination were  $0.13 \pm 0.03$  and  $0.19 \pm 0.05$  nmol ADPG/g FW, respectively. These values were comparable to those of previous HPLC and HPLC-MS/MS analyses of ADPG content [15,31,58,63]. Most importantly, these analyses also revealed that, irrespective of the culture conditions, ADPG contents in *pgm* and *aps1* leaves were comparable to those of WT leaves (**Figure 2B**). Moreover, leaves of WT, *pgm* and *aps1* cultured on soil accumulated ca. 0.015 nmol ADPG/g FW in the end of the dark period (not shown).

Leaves impaired in pPGM and AGP accumulate 0.5%–3% of the WT starch [4,14,15,17,75]. The occurrence of low starch content in *pgm* leaves has been ascribed to marginally low import to the chloroplast of cytosolic G1P and subsequent AGP-mediated conversion into ADPG [8,57,65,75], whereas the occurrence of reduced starch content in *aps1* leaves has been ascribed to residual AGP activity from the large subunits [5,65]. The latter explanation is highly unlikely, since the AGP large subunits are unstable in the absence of APS1 in Arabidopsis [14,15]. Therefore, *aps1* null mutants lack not only the small APS1 AGP subunits, but also the large AGP subunits [14,15], which results in total lack of AGP activity [13,15].

We reasoned that if the above interpretations for the occurrence of reduced starch content in *aps1* and *pgm* leaves were correct, and if the pPGI-pPGM-AGP pathway is the sole source of ADPG in leaves, leaves of double *aps1/pgm* mutants should not accumulate any starch and ADPG at all. To test this hypothesis we crossed *aps1* and *pgm* mutants as indicated in Materials and Methods. The resulting *aps1/pgm* mutants were cultured on soil and the leaf ADPG and starch contents were measured. As shown in **Figure 2B**, this analyses revealed that, similar to *pgm* and *aps1* leaves, *aps1/pgm* leaves accumulated nearly WT ADPG content (**Figure 2B**). Furthermore, leaves of the double *aps1/pgm* mutant accumulated ca. 1.5% of the WT starch content.

The overall data (a) showed that pPGM and AGP are not major determinants of intracellular ADPG content, and (b) were consistent with the occurrence in Arabidopsis leaves of important ADPG source(s) other than the pPGI-pPGM-AGP pathway.

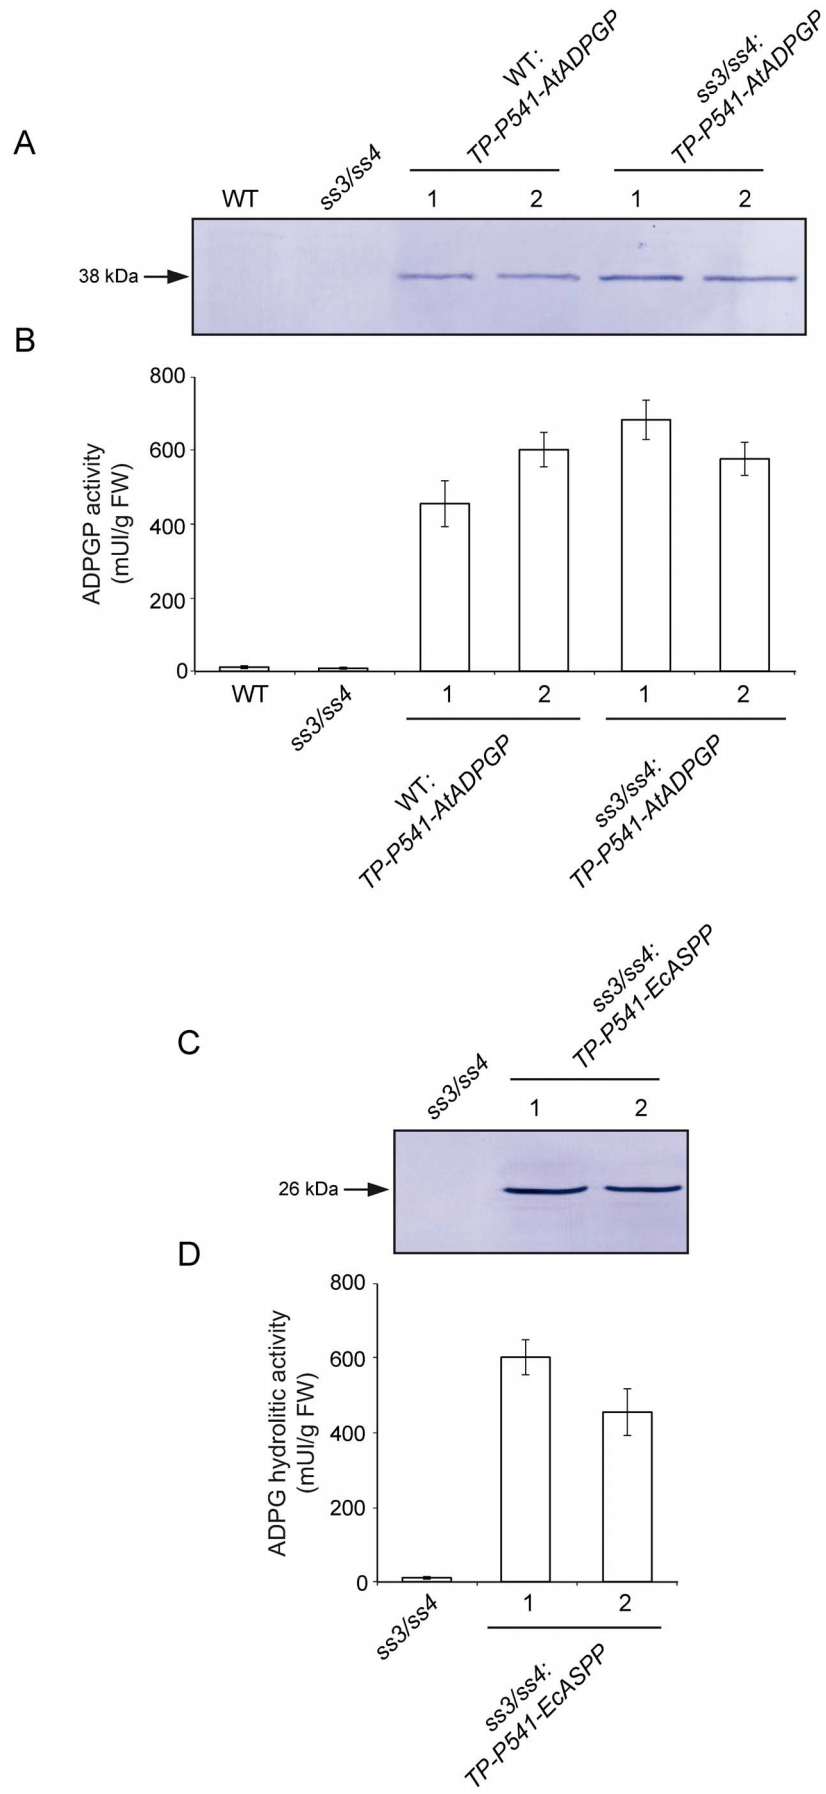

**Figure 3. Production of WT and *ss3/ss4* plants expressing AtADPGP or EcASPP in the plastid.** (A) Western blot of AtADPGP in leaves of WT and *ss3/ss4* plants, and leaves of two independent lines each of *TP-P541-AtADPGP* expressing WT plants and *TP-P541-AtADPGP* expressing *ss3/ss4* plants. (B) ADPGP activity in leaves of WT and *ss3/ss4* plants, and leaves of *TP-P541-AtADPGP* expressing WT plants and *TP-P541-AtADPGP* expressing *ss3/ss4* plants. (C) Western blot of EcASPP in *ss3/ss4* leaves, and leaves of two independent lines of *TP-P541-EcASPP* expressing *ss3/ss4* plants. (D) ASPP activity in *ss3/ss4* leaves and leaves of two independent *TP-P541-EcASPP* expressing *ss3/ss4* plants. In "A" and "C", the gels were loaded with 20  $\mu$ g per lane of protein and AtADPGP and EcASPP were immunodecorated by using antisera specifically raised against AtADPGP and EcASPP. doi:10.1371/journal.pone.0104997.g003

### The contribution of the chloroplastic ADPG pool to the total ADPG pool is low in WT and *aps1* leaves

Our previous HPLC based ADPG content measurement analyses revealed that *aps1* leaves expressing in the plastid either GlgC (*TP-P541-glgC* expressing *aps1* plants) or EcASPP (*TP-P541-EcASPP* expressing *aps1* plants) accumulate WT ADPG content [15]. *TP-P541-glgC* expressing *aps1* leaves accumulated WT starch content, whereas *TP-P541-EcASPP* expressing *aps1* leaves accumulated ca. 50% less starch than *aps1* leaves [15]. The overall data thus provided evidence that (a) AGP is not a major determinant of intracellular ADPG levels, and (b) the contribution of plastidic ADPG to the total ADPG pool is very low in *Arabidopsis* leaves [15]. To further test the validity of these conclusions, we measured by HPLC-MS/MS the ADPG content in leaves of two independent *TP-P541-glgC* expressing *aps1* lines and two independent *TP-P541-EcASPP* expressing *aps1* and WT plants. We must emphasize that our previous studies showed that leaves of *TP-P541-EcASPP* expressing plants accumulate as much as ca. 50% of the starch accumulated by the leaves of the parental plants [15,27]. This moderate reduction in the starch content exerted by the ectopic expression of EcASPP in the chloroplast may be ascribed to the relatively low affinity of EcASPP for ADPG ( $K_m$  being 160  $\mu$ M [61]) combined with very low concentration of ADPG in the chloroplast. Therefore, to further reduce the plastidic ADPG pool we also produced WT plants expressing *Arabidopsis thaliana* ADPG phosphorylase (AtADPGP) in the chloroplast (*TP-P541-AtADPGP* expressing WT plants) (Figure 3A,B). ADPGP (E.C. 2.7.7.36) is a widely distributed cytosolic enzyme exhibiting high affinity for ADPG ( $K_m$  for ADPG being 7  $\mu$ M [67]) that catalyzes the phosphorytic breakdown of ADPG into ADP and G1P [67,76,77]. Fluorescence distribution pattern in *TP-P541-AtADPGP-GFP* expressing cells confirmed the exclusive plastidial localization of AtADPGP in *TP-P541-AtADPGP* expressing cells (Figure S3).

To test whether EcASPP and AtADPGP are active in the chloroplast, we also produced *ss3/ss4* plants ectopically expressing in the plastid either EcASPP or AtADPGP (Figure 3A–D). *ss3/ss4* leaves display a high ADPG content phenotype as a consequence of impairments in starch granule initiation and synthesis [65], a phenotype that can be partially reverted by the introduction of the *aps1* mutation [65]. Furthermore, *ss3/ss4* plants display a severe dwarf phenotype due to accumulation of high ADPG content in the chloroplast [65]. We reasoned that if EcASPP and AtADPGP are active in the chloroplast *TP-P541-EcASPP* and *TP-P541-AtADPGP* expressing *ss3/ss4* plants should display a WT growth phenotype and their leaves should accumulate less ADPG than *ss3/ss4* leaves. Consistent with this presumption *TP-P541-EcASPP* and *TP-P541-AtADPGP* expressing *ss3/ss4* plants exhibited a nearly WT growth phenotype (Figure 4A). Moreover, the ectopic expression in the plastid of EcASPP and AtADPGP resulted in a 5-fold decrease of ADPG content in *ss3/ss4* leaves (Figure 4B). Leaves of *TP-P541-EcASPP* and *TP-P541-AtADPGP* expressing *ss3/ss4* plants still exhibited ca. 300–400 fold more ADPG than WT leaves. This high ADPG content was comparable to that of *ss3/ss4/aps1* leaves

impaired in both starch granule initiation and chloroplastic ADPG synthesis (Figure 4B). The overall data thus showed that (a) both EcASPP and AtADPGP are active in the chloroplast, and (b) plastidic expression of EcASPP and AtADPGP can be utilized as a trait to reduce the plastidic ADPG pool.

As shown in Figure 5A, starch contents in leaves of plants from two independent *TP-P541-AtADPGP* and *TP-P541-EcASPP* expressing WT lines were ca. 3% and 50% of that of WT leaves, respectively, which further confirms that active ADPGP and EcASPP have access to the plastidic pool of ADPG. The fact that the expression of AtADPGP (whose  $K_m$  for ADPG is 7  $\mu$ M) in the chloroplast resulted in a strong (ca. 97%) reduction of the starch content, whereas expression of EcASPP (whose  $K_m$  for ADPG is 160  $\mu$ M) in the chloroplast resulted in a moderate (ca. 50%) reduction of starch content [15,27] (Figure 5A) points to the occurrence of very low concentration of ADPG in the chloroplast. In line with this presumption, despite the considerable reduction of starch content exerted by the ectopic expression of EcASPP and AtADPGP in the chloroplast, *TP-P541-AtADPGP* and *TP-P541-EcASPP* expressing WT leaves accumulated nearly WT ADPG content when plants were cultured on soil and MS medium (Figure 5B, Figure S4).

*aps1* leaves accumulate 1–2% of the WT starch content, a phenotype that is reverted to WT by the ectopic expression of GlgC in the plastid [15] (Figure 5A). Furthermore, *TP-P541-EcASPP* expressing *aps1* leaves accumulate 40–50% of the starch accumulated by *aps1* leaves [15] (Figure 5A). Despite the considerable enhancement and reduction of starch content exerted by the ectopic expression of GlgC and EcASPP in the chloroplast of *aps1* leaves, respectively, leaves of plants from two independent *TP-P541-glgC* expressing *aps1* lines, and leaves of plants from two independent *TP-P541-EcASPP* expressing *aps1* lines accumulated nearly WT ADPG content in two different culture conditions (Figure 5B, Figure S4).

The overall results thus provided strong evidence that (a) most of ADPG accumulates outside the chloroplast, and (b) the contribution of the chloroplastic ADPG pool to the total ADPG pool is low in WT and *aps1* leaves.

### Additional concluding remarks

HPLC-MS/MS studies carried out in this work by two independent laboratories showed that *aps1*, *pgm* and *aps1/pgm* leaves accumulate WT ADPG content (Figure 2), which provides strong evidence that leaves possess important ADPG sources other than the pPGI-pPGM-AGP pathway. As expected, leaves of plants ectopically expressing in the chloroplast either ADPG synthesis or breakdown enzymes accumulated higher and lower starch levels, respectively, than their parental lines (Figure 5A). However, these changes in starch content were not accompanied by concomitant changes in ADPG content (Figure 5B). This and the fact that the expression of ADPG cleaving enzymes in the cytosol results in reducing levels of both ADPG and starch [15,27] strongly indicate that (i) most of ADPG accumulates outside the chloroplast, and (ii) a sizable pool of ADPG occurring in the cytosol is linked to starch biosynthesis. That *ss3/ss4/aps1* leaves impaired in both starch granule initiation and AGP-mediated chloroplastic ADPG syn-



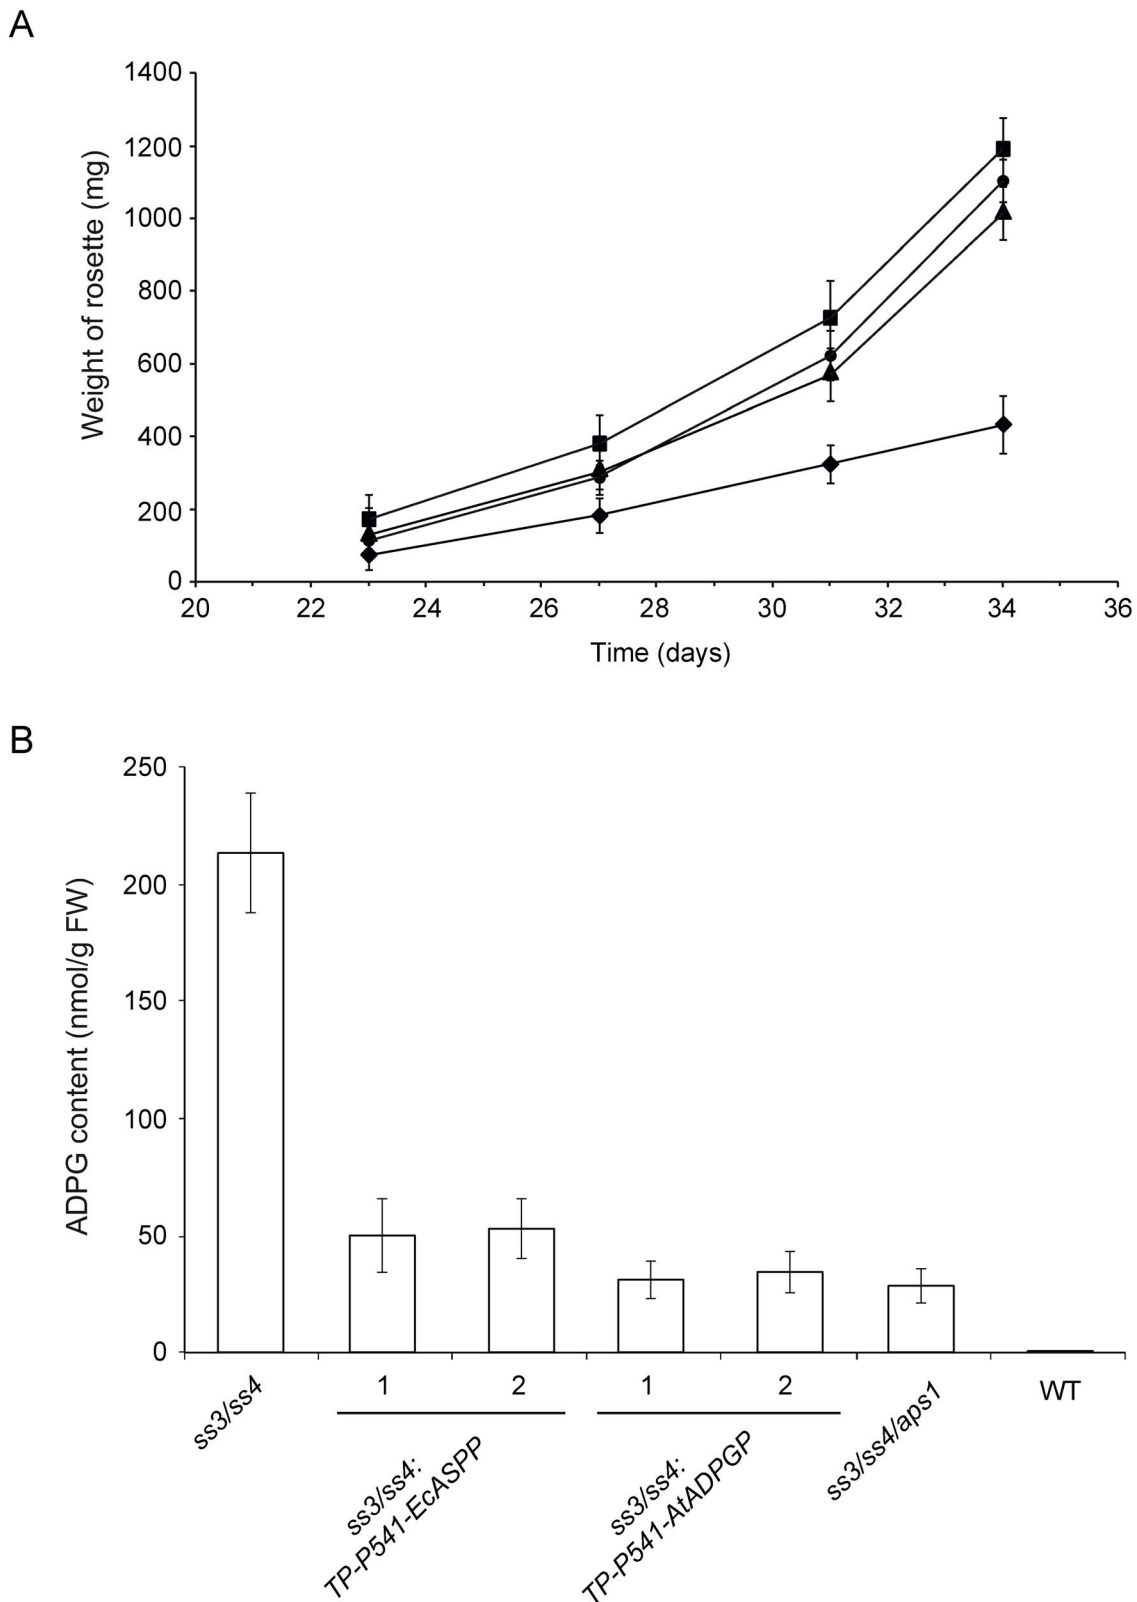

**Figure 4. Ectopic expression of EcASPP and AtADPGP in the plastid restores the WT growth and partially reverts the ADPG excess phenotype of *ss3/ss4* plants.** (A) Time-course of fresh weight of rosettes of WT (■) and *ss3/ss4* (◆) plants, and rosettes of one representative line each of *TP-P541-AtADPGP* expressing *ss3/ss4* plants and *TP-P541-EcASPP* expressing *ss3/ss4* plants (● and ▲, respectively). Plants were grown under long-day conditions (16 h light/8 h dark, 20°C) and at an irradiance of 90 μmol photons sec<sup>-1</sup> m<sup>-2</sup>. Values represent the mean ±SD of determinations on five independent plants. (B) ADPG content in WT, *aps1* and *ss3/ss4* leaves, and leaves of plants of two independent *TP-P541-EcASPP*- and *TP-P541-AtADPGP*- expressing *ss3/ss4* lines. Leaves were harvested after 10 h of illumination. Values represent the mean ±SD of determinations on three independent samples. doi:10.1371/journal.pone.0104997.g004

A

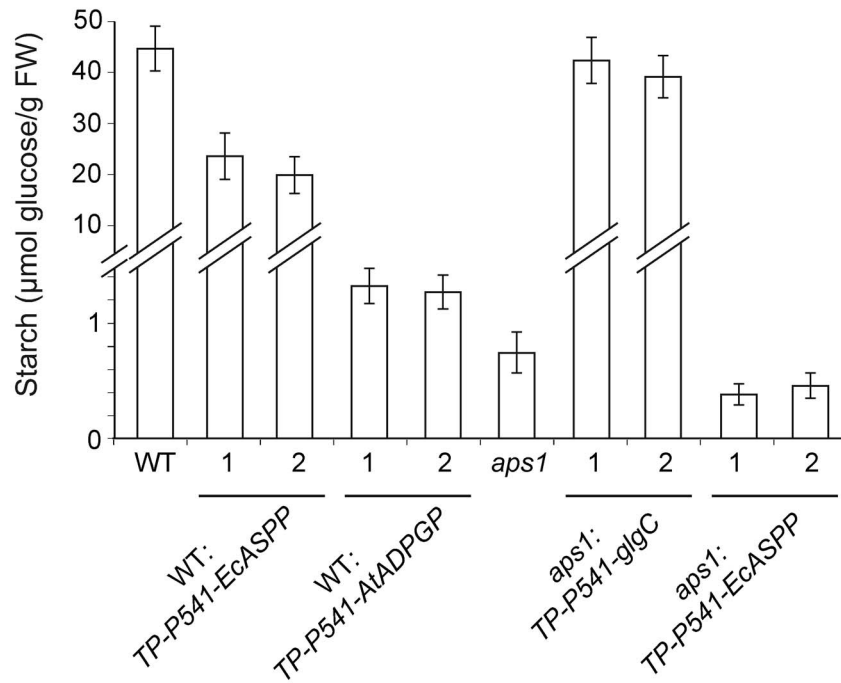

B

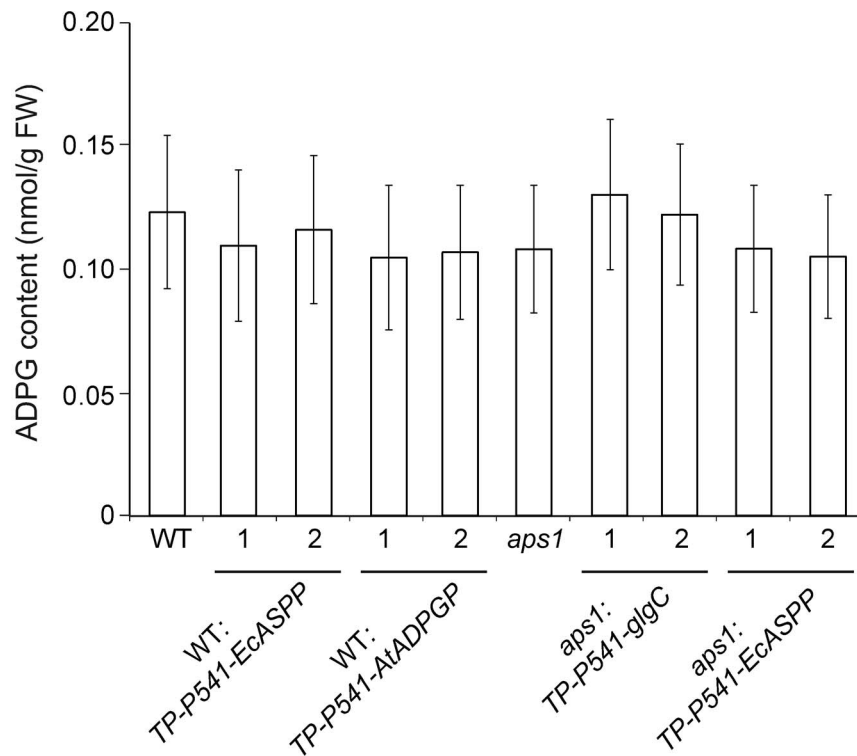

**Figure 5. The contribution of the chloroplastic ADPG pool to the total ADPG pool is low in WT and *aps1* leaves.** (A) Starch and (B) ADPG contents in leaves of WT and *aps1* plants, and leaves of two independent lines each of *TP-P541-AtADPG* expressing WT plants, *TP-P541-EcASPP* expressing WT plants, *TP-P541-glgC* expressing *aps1* plants, and *TP-P541-EcASPP* expressing *aps1* plants. Plants were simultaneously grown and leaves from 4-weeks old plants were simultaneously harvested after 10 h of illumination. ADPG was simultaneously extracted and measured by HPLC-

MS/MS as described in Materials and Methods. Note that, consistent with [15], leaves of *TP-P541-EcASPP* expressing WT plants, *TP-P541-glgC* expressing *aps1* plants, and *TP-P541-EcASPP* expressing *aps1* plants accumulated WT ADPG content. Values represent the mean  $\pm$ SD of determinations on three independent samples. Values represent the mean  $\pm$ SD of determinations on three independent samples. doi:10.1371/journal.pone.0104997.g005

this accumulate ca. 300-fold more ADPG than WT leaves (Figure 4) further supports the idea that ADPG can be synthesized outside the chloroplast.

Using HPLC-MS/MS we have recently shown that leaves of *pgi1* mutants impaired in pPGI accumulate WT ADPG content [78], which further reinforces the idea that leaves possess important ADPG sources other than the pPGI-pPGM-AGP pathway. These studies also showed that the low starch content phenotype of *pgi1* mutants is largely the consequence of combined factors including reduction of photosynthetic activity, rather than the lack of pPGI-mediated flow between the Calvin-Benson cycle and the pPGM-AGP starch biosynthetic pathway [78]. Moreover, our studies showed that *pgi1* leaves of plants exposed for few hours to the action of microbial volatiles can accumulate up to 15-fold more starch than WT leaves [79]. This, and the facts that (a) chloroplasts can incorporate extraplasmidial ADPG by means of a yet to be identified transporter and convert it into starch [33], (b) a sizable pool of ADPG accumulates outside the chloroplast [15,27,34] (this work), (c) cytosolic enzymes such as SuSy can produce ADPG [30,69,80–84], and (d) SuSy expresses in the mesophyll cells [85,86] prompted us to propose the model of transitory starch metabolism similar to that illustrated in Figure 1B.

The suggested starch biosynthetic model illustrated in Figure 1B involves simultaneous synthesis and breakdown of starch, and the pPGM and AGP-mediated scavenging of the starch breakdown products, thus making up a starch futile cycle. In this respect we must emphasize that many phylogenetically distant bacteria arrange all glycogen synthetic and breakdown genes in a single transcriptional unit, which guarantees simultaneous expression of glycogen synthesis and breakdown enzymes, and scavenging of glycogen breakdown products [49–53]. The resulting glycogen futile cycling would entail advantages such as dissipation of excess energy, sensitive regulation and rapid channeling of metabolic intermediates toward various metabolic pathways in response to biochemical needs [47,48,87,88]. Also, many phylogenetically distant bacteria possess various important sources, other than AGP, of ADPG linked to glycogen biosynthesis [89–93]. Since glycogen may play relevant roles in the survival of bacteria to sporadic periods of famine, and because the metabolism of this polyglucan is highly interconnected with multiple and important cellular processes [94,95], it is conceivable that both glycogen futile cycling and redundancy of ADPG sources were selected during bacterial evolution to guarantee the production of glycogen and its connection with other metabolic processes in response to physiological needs imposed by the environment and lifestyle [54]. Like in bacteria, starch is believed to act as a major integrator of the plant metabolic status that accumulates to cope with temporary starvation imposed by the environment [96]. Starch futile cycling may thus entail advantages such as rapid metabolic channeling toward various pathways (such as biosynthesis of fatty acids, OPPP, sulfolipid) [97,98] in response to physiological and biochemical needs. It is thus conceivable that, similar to bacteria, both redundancy of ADPG sources and starch futile cycling have been selected during plant evolution to warrant starch production and rapid connection of starch metabolism with other metabolic pathways.

## Supporting Information

**Figure S1 Stages to produce the 35S-TP-P541-AtADPGP, 35S-TP-P541-Ec-ASPP and 35S-TP-P541-AtADPGP-GFP plasmid constructs used to transform Arabidopsis plants.** For AtADPGP constructs, a complete *AtADPGP* cDNA was obtained from the ABRC cDNA collection (C105280). *TP-P541-AtADPGP* were generated by cloning *AtADPGP* in the plasmid pSK TP-P541 which was used as template to generate *35S-TP-P541-AtADPGP* and *35S-TP-P541-AtADPGP-GFP* plasmid constructs using the forward 5'-GGGGACAAGTTTGTACAAAAGCAGGCTTAATGACGTCACCCGAGCCAT-3' and the reverse 5'-GGGGACCACTTTGTACAAGAAAGCTGGGTA-TCAAGT-AAGGCTAACTTCCCGC-3' primers and the Gateway technology (Invitrogen, <http://www.invitrogen.com>). To produce the *35S-TP-P541-AtADPGP-GFP* plasmid construct the reverse primer 5'-GGGGACCACTTTGTACAAGAAAGC-TGGGTAAG-TAAGGCTAACTTCCCGCATAAC-3' was used to remove the stop codon from *AtADPGP*. DNA sequences of all constructs were confirmed by sequencing. (PDF)

**Figure S2 Stages to produce the pDEST17-AtADPGP plasmid construct used to transform E. coli cells.** (PDF)

**Figure S3 Plastidial localization of AtADPGP-GFP in leaves of TP-P541-AtADPGP-GFP expressing WT plants.** The upper panels show that AtADPGP-GFP fluorescence has a plastidial localization in leaf epidermal and mesophyll cells (bar 10  $\mu$ m). In the middle panel note that AtADPGP-GFP was present among the grana in the central part of the chloroplast, as well as in the grana-free peripheral part of the chloroplast of mesophyll cells (bar 10  $\mu$ m). The lower panels show a detailed view of plastid stromules in leaf epidermal cells (bar 2  $\mu$ m). Note that GFP fluorescence labelled long stroma-filled tubular extensions corresponding to plastid stromules. (EPS)

**Figure S4 ADPG content in leaves of WT plants, and leaves of TP-P541-AtADPGP expressing WT plants (line #1), TP-P541-EcASPP expressing WT plants (line #1), and TP-P541-EcASPP expressing aps1 plants (line #1) cultured on solid MS medium.** Leaves were harvested after 10 h of illumination. Values represent the mean  $\pm$ SD of determinations on three independent samples. (EPS)

**Table S1 Primers used for the identification of the triple *ss3/ss4/aps1* mutant plants.** (DOC)

**Table S2 Primers used for the identification of the double *aps1/pgm* mutant plants.** (DOC)

## Acknowledgments

We thank Dr. Ángel Mérida (Instituto de Bioquímica Vegetal y Fotosíntesis, Sevilla, Spain) who very kindly provided us the *ss3/ss4* seeds. We are thankful to María Teresa Sesma and Maite Hidalgo (Institute of Agrobiotechnology, Navarra, Spain) for technical support.

## Author Contributions

Conceived and designed the experiments: AB EB-F AMS-L TM JP-R. Performed the experiments: AB EB-F AMS-L FJM JL GA MM PP RG

## References

- Stitt M, Quick WP (1989) Photosynthetic carbon partitioning: its regulation and possibilities for manipulation. *Physiol Plantarum* 77: 633–641.
- Rao M, Terry N (1995) Leaf phosphate status, photosynthesis, and carbon partitioning in sugar beet. *Plant Physiol* 107: 195–202.
- Neuhaus HE, Häusler RE, Sonnewald U (2005) No need to shift the paradigm on the metabolic pathway to transitory starch in leaves. *Trends Plant Sci* 10: 154–156.
- Streb S, Egli B, Eicke S, Zeeman SC (2009) The debate on the pathway of starch synthesis: a closer look at low-starch mutants lacking plastidial phosphoglucomutase supports the chloroplast-localised pathway. *Plant Physiol* 151: 1769–1772.
- Stitt M, Zeeman SC (2012) Starch turnover: pathways, regulation and role in growth. *Curr Opin Plant Biol* 15: 1–11.
- Kleczkowski LA (1999) A phosphoglycerate to inorganic phosphate ratio is the major factor in controlling starch levels in chloroplasts via ADP-glucose pyrophosphorylase regulation. *FEBS Lett* 448: 153–156.
- Kleczkowski LA (2000) Is leaf ADP-glucose pyrophosphorylase an allosteric enzyme? *Biochim Biophys Acta* 1476: 103–108.
- Streb S, Zeeman SC (2012) Starch metabolism in Arabidopsis. *The Arabidopsis book* 10:e0160. DOI: 10.1199/tab.0160.
- Crevillén P, Ballicora MA, Mérida A, Preiss J, Romero JM (2003) The different large subunit isoforms of *Arabidopsis thaliana* ADP-glucose pyrophosphorylase confer distinct kinetic and regulatory properties to the heterotetrameric enzyme. *J Biol Chem* 278: 28508–28515.
- Crevillén P, Ventriglia T, Pinto F, Orea A, Mérida A, et al. (2005) Differential pattern of expression and sugar regulation of *Arabidopsis thaliana* ADP-glucose pyrophosphorylase-encoding genes. *J Biol Chem* 280: 8143–8149.
- Sokolov LN, Déjardin A, Kleczkowski LA (1998) Sugars and light/dark exposure trigger differential regulation of ADP-glucose pyrophosphorylase genes in *Arabidopsis thaliana* (thale cress). *Biochem J* 336: 681–687.
- Zhang J (2003) Evolution by gene duplication: an update. *Trends Ecol Evol* 18: 292–298.
- Ventriglia T, Kuhn ML, Ruiz MT, Ribeiro-Pedro M, Valverde F, et al. (2008) Two Arabidopsis ADP-glucose pyrophosphorylase large subunits (APL1 and APL2) are catalytic. *Plant Physiol* 148: 65–76.
- Wang SM, Lue WL, Yu T-S, Long JH, Wang CN, et al. (1998) Characterization of *ADG1*, an Arabidopsis locus encoding for ADPG pyrophosphorylase small subunit, demonstrates that the presence of the small subunit is required for large subunit stability. *Plant J* 13: 63–70.
- Bahaji A, Li J, Ovecka M, Ezquer I, Muñoz FJ, et al. (2011) *Arabidopsis thaliana* mutants lacking ADP-glucose pyrophosphorylase accumulate starch and wild-type ADP-glucose content: further evidence for the occurrence of important sources, other than ADP-glucose pyrophosphorylase, of ADP-glucose linked to leaf starch biosynthesis. *Plant Cell Physiol* 52: 1162–1176.
- Yu T-S, Lue W-L, Wang S-M, Chen J (2000) Mutation of Arabidopsis plastid phosphoglucomutase isomerase affects leaf starch synthesis and floral initiation. *Plant Physiol* 123: 319–325.
- Kunz HH, Häusler RE, Fettek J, Herbst K, Niewiadomski P, et al. (2010) The role of plastidial glucose-6-phosphate/phosphate translocators in vegetative tissues of Arabidopsis thaliana mutants impaired in starch biosynthesis. *Plant Biol (Stuttg)* 12 Suppl 1: 115–128.
- Caspar T, Huber SC, Somerville C (1985) Alterations in growth, photosynthesis, and respiration in a starchless mutant of *Arabidopsis thaliana* (L.) deficient in chloroplast phosphoglucomutase activity. *Plant Physiol* 79: 11–17.
- Kofler H, Häusler RE, Schulz B, Gröner F, Flügge U-I, et al. (2000) Molecular characterization of a new mutant allele of the plastid phosphoglucomutase in *Arabidopsis*, and complementation of the mutant with the wild-type cDNA. *Mol Gen Genet* 262: 978–986.
- Lin T-P, Caspar T, Somerville C, Preiss J (1988) Isolation and characterization of a starchless mutant of *Arabidopsis thaliana* (L.) Heynh lacking ADPglucose pyrophosphorylase activity. *Plant Physiol* 86: 1131–1135.
- Asatsuma S, Sawada C, Itoh K, Okito M, Kitajima A, et al. (2005) Involvement of  $\alpha$ -amylase I-1 in starch degradation in rice chloroplasts. *Plant Cell Physiol* 46: 858–869.
- Fulton DC, Stettler M, Mettler T, Vaughan CK, Li J, et al. (2008)  $\beta$ -amylase4, a noncatalytic protein required for starch breakdown, acts upstream of three active  $\beta$ -amylases in *Arabidopsis* chloroplasts. *Plant Cell* 20: 1040–1058.
- Streb S, Eicke S, Zeeman SC (2012) The simultaneous abolition of three starch hydrolases blocks transient starch breakdown in Arabidopsis. *J Biol Chem* 287: 41745–41756.
- Cho MH, Lim H, Shin DH, Jeon JS, Bhoo SH, et al. (2011) Role of the plastidic glucose translocator in the export of starch degradation products from the chloroplasts in *Arabidopsis thaliana*. *New Phytol* 109: 101–112.
- Olsson T, Thelander M, Ronne H (2003) A novel type of chloroplast stromal hexokinase is the major glucose-phosphorylating enzyme in the moss *Physcomitrella patens*. *J Biol Chem* 278: 44439–44447.
- Giese JO, Herbers K, Hoffmann M, Klösgen RB, Sonnewald U (2005) Isolation and functional characterization of a novel plastidic hexokinase from *Nicotiana tabacum*. *FEBS Lett* 579: 827–831.
- Baroja-Fernández E, Muñoz FJ, Zanducta-Criado A, Moran-Zorzano MT, Viale AM, et al. (2004) Most of ADP-glucose linked to starch biosynthesis occurs outside the chloroplast in source leaves. *Proc Natl Acad Sci USA* 101: 13080–13085.
- Baroja-Fernández E, Muñoz FJ, Pozueta-Romero J (2005) A response to Neuhaus, et al. *Trends Plant Sci* 10: 156–158.
- Baroja-Fernández E, Muñoz FJ, Bahaji A, Almagro G, Pozueta-Romero J (2012a) Reply to Smith, et al.: No pressing biological evidence to challenge the current paradigm on starch and cellulose biosynthesis involving sucrose synthase activity. *Proc Natl Acad Sci USA* 109:E777.
- Baroja-Fernández E, Muñoz FJ, Li J, Bahaji A, Almagro G, et al. (2012b) Sucrose synthase activity in the *sus1/sus2/sus3/sus4* Arabidopsis mutant is sufficient to support normal cellulose and starch production. *Proc Natl Acad Sci USA* 109: 321–326.
- Muñoz FJ, Baroja-Fernández E, Morán-Zorzano MT, Viale AM, Etxeberria E, et al. (2005) Sucrose synthase controls the intracellular levels of ADPglucose linked to transitory starch biosynthesis in source leaves. *Plant Cell Physiol* 46: 1366–1376.
- Muñoz FJ, Morán-Zorzano MT, Alonso-Casajús N, Baroja-Fernández E, Etxeberria E, et al. (2006) New enzymes, new pathways and an alternative view on starch biosynthesis in both photosynthetic and heterotrophic tissues of plants. *Biocatal Biotransformation* 24: 63–76.
- Pozueta-Romero J, Ardila F, Akazawa T (1991) ADPglucose transport by adenylate translocator in chloroplasts is linked to starch biosynthesis. *Plant Physiol* 97: 1565–1572.
- Bahaji A, Li J, Sánchez-López AM, Baroja-Fernández E, Muñoz FJ, et al. (2014) Starch biosynthesis, its regulation and biotechnological approaches to improve crop yields. *Biotechnol Adv* 32: 87–106.
- Stitt M, Heldt HW (1981) Simultaneous synthesis and degradation of starch in spinach chloroplasts in the light. *Biochim Biophys Acta* 638: 1–11.
- Fox TC, Geiger DR (1984) Effects of decreased net carbon exchange on carbohydrate metabolism in sugar beet source leaves. *Plant Physiol* 76: 763–768.
- Scott P, Kruger NJ (1995) Influence of elevated fructose-2,6-bisphosphate levels on starch mobilization in transgenic tobacco leaves in the dark. *Plant Physiol* 108: 1569–1577.
- Walters RG, Ibrahim DG, Horton P, Kruger NJ (2004) A mutant of *Arabidopsis* lacking the triose-phosphate/phosphate translocator reveals metabolic regulation of starch breakdown in the light. *Plant Physiol* 135: 891–906.
- Lozovaya VV, Zabolina OA, Widholm JM (1996) Synthesis and turnover of cell-wall polysaccharides and starch in photosynthetic soybean suspension cultures. *Plant Physiol* 111: 921–929.
- Szczewka M, Heise R, Tohge T, Nunes-Nesi A, Vosloh D, et al. (2013) Metabolic fluxes in an illuminated *Arabidopsis* rosette. *Plant Cell* 25: 694–714.
- Caspar T, Lin TP, Kakefuda G, Benbow L, Preiss J, et al. (1991) Mutants of *Arabidopsis* with altered regulation of starch degradation. *Plant Physiol* 95: 1181–1188.
- David M, Petit WA, Laughlin MR, Shulman RG, King JE, et al. (1990) Simultaneous synthesis and degradation of rat liver glycogen. *J Clin Invest* 86: 612–617.
- Massillon D, Bollen M, De Wulf H, Overloop K, Vanstapel F, et al. (1995) Demonstration of a glycogen/glucose 1-phosphate cycle in hepatocytes from fasted rats. *J Biol Chem* 270: 19351–19356.
- Bollen M, Keppens S, Stalmans W (1998) Specific features of glycogen metabolism in the liver. *Biochem J* 336: 19–31.
- Lehmann M, Wöber G (1976) Accumulation, mobilization and turn-over of glycogen in the blue-green bacterium *Anacystis nidulans*. *Arch Microbiol* 111: 93–97.
- Gaudet G, Forano E, Dauphin G, Delort A-M (1992) Futile cycling of glycogen in *Fibrobacter succinogenes* as shown by in situ  $^1\text{H-NMR}$  and  $^{13}\text{C-NMR}$  investigation. *Eur J Biochem* 207: 155–162.
- Belanger AE, Hatfull GF (1999) Exponential-phase glycogen recycling is essential for growth of *Mycobacterium smegmatis*. *J Bacteriol* 181: 6670–6678.
- Guedon E, Desvaux M, Petitdemange H (2000) Kinetic analysis of *Clostridium cellulolyticum* carbohydrate metabolism: importance of glucose 1-phosphate and glucose 6-phosphate branch points for distribution of carbon fluxes inside and outside cells as revealed by steady-state continuous culture. *J Bacteriol* 182: 2010–2017.
- Kiel JAKW, Boels JM, Geldman G, Venema G (1994) Glycogen in *Bacillus subtilis*: molecular characterization of an operon encoding enzymes involved in glycogen biosynthesis and degradation. *Mol Microbiol* 11: 203–218.
- Ugalde JE, Lepek V, Uttaro A, Estrella J, Iglesias A, et al. (1998) Gene organization and transcription analysis of the *Agrobacterium tumefaciens*

- glycogen (glg) operon: two transcripts for the single phosphoglucomutase gene. *J Bacteriol* 180: 6557–6564.
51. Marroquí S, Zorreguieta A, Santamaría C, Temprano F, Soberón M, et al. (2001) Enhanced symbiotic performance by *Rhizobium tropici* glycogen synthase mutants. *J Bacteriol* 183: 854–864.
  52. Lepek VC, D'Antuono AL, Tomatis PE, Ugalde JE, Giambiagi S, et al. (2002) Analysis of *Mesorhizobium loti* glycogen operon: effect of phosphoglucomutase (pgm) and glycogen synthase (glgA) null mutants on nodulation of *Lotus tenuis*. *Mol Plant Microbe Interact* 15: 368–375.
  53. Montero M, Almagro G, Eydallin G, Viale AM, Muñoz FJ, et al. (2011) *Escherichia coli* glycogen genes are organized in a single *glgBXCAP* transcriptional unit possessing an alternative suboperonic promoter within *glgC* that directs *glgAP* expression. *Biochem J* 433: 107–118.
  54. Wilson WA, Roach PJ, Montero M, Baroja-Fernández E, Muñoz FJ, et al. (2010) Regulation of glycogen metabolism in yeast and bacteria. *FEMS Microbiol Rev* 34: 952–985.
  55. Okita TW (1992) Is there an alternative pathway for starch synthesis? *Plant Physiol* 100: 560–564.
  56. Baroja-Fernández E, Muñoz FJ, Akazawa T, Pozueta-Romero J (2001) Reappraisal of the currently prevailing model of starch biosynthesis in photosynthetic tissues: A proposal involving the cytosolic production of ADP-glucose by sucrose synthase and occurrence of cyclic turnover of starch in chloroplast. *Plant Cell Physiol* 42: 1311–1320.
  57. Zeeman SC, Smith SM, Smith AM (2007) The diurnal metabolism of leaf starch. *Biochem J* 401: 13–28.
  58. Barratt DHP, Derbyshire P, Findlay K, Pike M, Wellner N, et al. (2009) Normal growth of *Arabidopsis* requires cytosolic invertase but not sucrose synthase. *Proc Natl Acad Sci USA* 106: 13124–13129.
  59. Geigenberger P (2011) Regulation of starch biosynthesis in response to a fluctuating environment. *Plant Physiol* 155: 1566–1577.
  60. Smith AM, Kruger NJ, Lunn JE (2012) Source of nucleotides for starch and cellulose synthesis. *Proc Natl Acad Sci USA* 109: E776.
  61. Moreno-Bruna B, Baroja-Fernández E, Muñoz FJ, Bastarrica-Berasategui A, Zanduetta-Criado A, et al. (2001) Adenosine diphosphate sugar pyrophosphatase prevents glycogen biosynthesis in *Escherichia coli*. *Proc Natl Acad Sci USA* 98: 8128–8132.
  62. Crumpton-Taylor M, Pike M, Lu K-J, Hylton CM, Feil R, et al. (2013) Starch synthase 4 is essential for coordination of starch granule formation with chloroplast division during *Arabidopsis* leaf expansion. *New Phytol* 200: 1064–1075.
  63. Chen M, Thelen JJ (2011) Plastid uridine salvage activity is required for photoassimilate allocation and partitioning in *Arabidopsis*. *Plant Cell* 23: 2991–3006.
  64. Lunn JE, Feil R, Hendriks JHM, Gibon Y, Morcuende R, et al. (2006) Sugar-induced increases in trehalose 6-phosphate are correlated with redox activation of ADPglucose pyrophosphorylase and higher rates of starch synthesis in *Arabidopsis thaliana*. *Biochem J* 397: 139–148.
  65. Ragel P, Streb S, Feil R, Sahrawy M, Annunziata MG, et al. (2013) Loss of starch granule initiation has a deleterious effect on the growth of *Arabidopsis thaliana* plants due to accumulation of ADP-glucose. *Plant Physiol* 163: 75–85.
  66. Martins MCM, Hejazi M, Fettek J, Steup M, Feil R, et al. (2013) Feedback inhibition of starch degradation in *Arabidopsis* leaves mediated by trehalose 6-phosphate. *Plant Physiol* 163: 1142–1163.
  67. McCoy JG, Arabshahi A, Bitto E, Bingman CA, Ruzicka FJ, et al. (2006) Structure and mechanism of an ADP-glucose phosphorylase from *Arabidopsis thaliana*. *Biochemistry* 45: 3145–3162.
  68. Tacke M, Yang Y, Steup M (1991) Multiplicity of soluble glucan-synthase activity in spinach leaves: enzyme pattern and intracellular location. *Planta* 185: 220–226.
  69. Zervosen A, Römer U, Elling L (1998) Application of recombinant sucrose synthase-large scale synthesis of ADP-glucose. *J Mol Catalysis B: Enzymatic* 5: 25–28.
  70. Szydłowski N, Ragel P, Raynaud S, Roldán I, Montero M, et al. (2009) Starch granule initiation in *Arabidopsis* requires the presence of either class IV or class III starch synthase. *Plant Cell* 21: 2443–2457.
  71. Clough SJ, Bent AF (1998) Floral dip: a simplified method for *Agrobacterium*-mediated transformation of *Arabidopsis thaliana*. *Plant J* 16: 735–743.
  72. Rodríguez-López M, Baroja-Fernández E, Zanduetta-Criado A, Pozueta-Romero J (2000) Adenosine diphosphate glucose pyrophosphatase: a plastidial phosphodiesterase that prevents starch biosynthesis. *Proc Natl Acad Sci USA* 97: 8705–8710.
  73. Yamada K, Lim J, Dale JM, Chen H, Shinn P, et al. (2003) Empirical analysis of transcriptional activity in the *Arabidopsis* genome. *Science* 302: 842–846.
  74. Kaneko K, Inomata T, Masui T, Koshu T, Umezawa Y, et al. (2014) Nucleotide pyrophosphatase/phosphodiesterase I exerts a negative effect on starch accumulation and growth in rice seedlings under high temperature and CO<sub>2</sub> concentration conditions. *Plant Cell Physiol* 55: 320–332.
  75. Fettek J, Malinova I, Albrecht T, Hejazi M, Steup M (2011) Glucose 1-phosphate transport into protoplasts and chloroplasts from leaves of *Arabidopsis thaliana*. *Plant Physiol* 155: 1723–1734.
  76. Dankert M, Gonçalves IRJ, Recondo E (1964) Adenosine diphosphate glucose:orthophosphate adenylyltransferase in wheat germ. *Biochim Biophys Acta* 81: 78–85.
  77. Murata T (1977) Partial purification and some properties of ADP-glucose phosphorylase from potato tubers. *Agric Biol Chem* 41: 1995–2002.
  78. Bahaji A, Sánchez-López AM, Li J, Baroja-Fernández E, Muñoz FJ, et al. (2013) The Calvin-Benson cycle is not directly linked to transitory starch biosynthesis by means of phosphoglucose isomerase in plants exposed to microbial volatiles. XIII Spain-Portugal Congress on Plant Physiology (24–27 July 2013, Lisbon, Portugal).
  79. Bahaji A, Sánchez-López AM, Muñoz FJ, Baroja-Fernández E, Li J, et al. (2014) Reevaluating the involvement of plastidic phosphoglucoseisomerase in starch biosynthesis in mesophyll cells. XII Plant Molecular Biology Meeting, Cartagena, Spain.
  80. Murata T, Sugiyama T, Minamikawa T, Akazawa T (1966) Enzymic mechanism of starch synthesis in ripening rice grains. Mechanism of the sucrose-starch conversion. *Arch Biochem Biophys* 113: 34–44.
  81. Delmer DP (1970) The purification and properties of sucrose synthase from etiolated *Phaseolus aureus* seedlings. *J Biol Chem* 247: 3822–3828.
  82. Sliwinski JE, Snyder FW (1979) Comparative enzymic studies of sucrose metabolism in the taproots and fibrous roots of *Beta vulgaris* L. *Plant Physiol* 64: 1070–1073.
  83. Tanase K, Yamaki S (2000) Purification and characterization of two sucrose synthase isoforms from Japanese pear fruit. *Plant Cell Physiol* 41: 408–414.
  84. Baroja-Fernández E, Muñoz FJ, Saikusa T, Rodríguez-López M, Akazawa T, et al. (2003) Sucrose synthase catalyzes the *de novo* production of ADPglucose linked to starch biosynthesis in heterotrophic tissues of plants. *Plant Cell Physiol* 44: 500–509.
  85. Fu H, Kim SY, Park WD (1995) A potato *sus3* sucrose synthase gene contains a context-dependent 3' element and a leader intron with both positive and negative tissue-specific effects. *Plant Cell* 7: 1395–1403.
  86. Wang A-Y, Kao M-H, Yang W-H, Sayion Y, Liu L-F, et al. (1999) Differentially and developmentally regulated expression of three rice sucrose synthase genes. *Plant Cell Physiol* 40: 800–807.
  87. Newsholme EA, Challiss RAJ, Crabtree B (1984) Substrate cycles: their role in improving sensitivity in metabolic control. *Trends Biochem Sci* 9: 277–280.
  88. Neijssel OM, Buurman ET, Teixeira de Matos MJ (1990) The role of futile cycles in the energetics of bacterial growth. *Biochim Biophys Acta* 1018: 252–255.
  89. Martín MC, Schencider D, Bruton CJ, Chater KF, Hardison C (1997) A *glgC* gene essential only for the first two spatially distinct phases of glycogen synthesis in *Streptomyces coelicolor*. *J Bacteriol* 179: 7784–7789.
  90. Eydallin G, Morán-Zorzano MT, Muñoz FJ, Baroja-Fernández E, Montero M, et al. (2007) An *Escherichia coli* mutant producing a truncated inactive form of GlgC synthesizes glycogen: further evidences for the occurrence of various important sources of ADPglucose in enterobacteria. *FEBS Lett* 581: 4417–4422.
  91. Morán-Zorzano MT, Alonso-Casajús N, Muñoz FJ, Viale AM, Baroja-Fernández E, et al. (2007) Occurrence of more than one important source of ADPglucose linked to glycogen biosynthesis in *Escherichia coli* and *Salmonella enterica*. *FEBS Lett* 581: 4423–4429.
  92. Sambou T, Dinadayala P, Stadthagen G, Barilone N, Bordat Y, et al. (2008) Capsular glucan and intracellular glycogen of *Mycobacterium tuberculosis*: biosynthesis and impact on the persistence in mice. *Mol Microbiol* 70: 762–774.
  93. Guerra LT, Xu Y, Bennette N, McNeely K, Bryant DA, et al. (2013) Natural osmolytes are much less effective substrates than glycogen for catabolic energy production in the marine cyanobacterium *Synechococcus* sp. strain PCC 7002. *J Biotechnol* 166: 65–75.
  94. Eydallin G, Viale AM, Morán-Zorzano MT, Muñoz FJ, Montero M, et al. (2007) Genome-wide screening of genes affecting glycogen metabolism in *Escherichia coli*. *FEBS Lett* 581: 2947–2953.
  95. Montero M, Eydallin G, Viale AM, Almagro G, Muñoz FJ, et al. (2009) *Escherichia coli* glycogen metabolism is controlled by the PhoP-PhoQ regulatory system at submillimolar environmental Mg<sup>2+</sup> concentrations, and is highly interconnected with a wide variety of cellular processes. *Biochem J* 424: 129–141.
  96. Sulpice R, Pyl E-T, Ishihara H, Trenkamp S, Steinfath M, et al. (2009) Starch as a major integrator in the regulation of plant growth. *Proc Natl Acad Sci USA* 106: 10348–10353.
  97. Zeeman SC, Thomeycroft D, Schupp N, Chapple A, Weck M, et al. (2004) Plastidial  $\alpha$ -glucan phosphorylase is not required for starch degradation in *Arabidopsis* leaves but has a role in the tolerance of abiotic stress. *Plant Physiol* 135: 849–858.
  98. Okazaki Y, Shimojima M, Sawada Y, Toyooka K, Narisawa T, et al. (2009) A chloroplastic UDP-glucose pyrophosphorylase from *Arabidopsis* is the committed enzyme for the first step of sulfolipid biosynthesis. *Plant Cell* 21: 892–909.
